# Supplementary material
Source: PubMed Central journal article supplement (PMC1369264)
Supplement: 7400636-s1.pdf [file 7400636-s1.pdf]

## Supplementary information for 'Mechanisms of genetic robustness in RNA viruses' by Elena *et al.*

**Table S1** | Survey of mutational fitness effects for different RNA viruses. Data are expressed in a common per generation scale.

| <b>Virus</b>                   | <b>Experimental strategy</b>                 | <b>Fitness measure</b>        | <b>s (<math>\pm</math> SEM)</b>        | <b>Sample size<sup>1</sup></b> | <b>Reference</b>                                           |
|--------------------------------|----------------------------------------------|-------------------------------|----------------------------------------|--------------------------------|------------------------------------------------------------|
| Phage $\phi$ 6                 | MA<br>?                                      | Plaque size<br>Total fitness  | 0.033 $\pm$ 0.008<br>0.103             | ?<br>11 (11)                   | Burch & Chao (2004)                                        |
| Poliovirus 1                   | Chemical mutagenesis                         | Viability                     | 0.230                                  | ?                              | Burch & Chao (2004); Crotty <i>et al</i> (2001)            |
| Foot-and-mouth disease         | MA<br>Chemical mutagenesis                   | Total fitness<br>Productivity | 0.108 $\pm$ 0.025<br>0.576 $\pm$ 0.096 | 13 (56)<br>6 (?)               | Escarmis <i>et al</i> (1996)<br>Sierra <i>et al</i> (2000) |
| Vesicular stomatitis           | MA<br>Site-directed mutagenesis <sup>2</sup> | Total fitness<br>Growth rate  | 0.003 $\pm$ 0.001<br>0.458 $\pm$ 0.064 | 49 (?)<br>22 (22)              | Elena & Moya (1999)<br>Sanjuán <i>et al</i> (2004)         |
| Dengue                         | MA <sup>3</sup>                              | Plaque size                   | 0.147 $\pm$ 0.027                      | 16 (6)                         | Butrapet <i>et al</i> (2000)                               |
| Tick-borne encephalitis        | PCR mutagenesis                              | Plaque size                   | 0.023 $\pm$ 0.012                      | 4 (5)                          | Gritsun <i>et al</i> (2001)                                |
| Venezuelan equine encephalitis | MA <sup>3</sup>                              | Plaque size                   | 0.069 $\pm$ 0.008                      | 13 (10)                        | Kinney <i>et al</i> (1993)                                 |
| Human immunodeficiency type 1  | MA                                           | Total fitness                 | 0.146 $\pm$ 0.109                      | 4 (49)                         | Yuste <i>et al</i> (1999, 2000, 2005)                      |

<sup>1</sup> Number of mutant genotypes tested. The number in parentheses corresponds to the total number of different mutations used.

<sup>2</sup> 40% of mutations were lethal, but they have been excluded from the calculation to allow comparison with the other studies.

<sup>3</sup> In vaccine candidates.

MA, mutation accumulation; PCR, polymerase chain reaction; SEM, standard error of the mean.

**Table S2** | Survey of mutational fitness effects for organisms with DNA genomes. Data are expressed in a common per generation scale.

| Organism                                  | Experimental strategy  | Fitness measure     | $s$ ( $\pm$ SEM)  | Sample size <sup>1</sup> | Reference                                    |
|-------------------------------------------|------------------------|---------------------|-------------------|--------------------------|----------------------------------------------|
| <i>Escherichia coli</i>                   | MA                     | Growth rate         | 0.019             | 250 lines                | Kibota & Lynch (1996)                        |
|                                           | Transposon mutagenesis | Total fitness       | 0.035 $\pm$ 0.010 | 138 (138)                | Elena <i>et al</i> (1998)                    |
| <i>Saccharomyces cerevisiae</i> (haploid) | Chemical mutagenesis   | Growth rate         | 0.149 $\pm$ 0.019 | 104 (104)                | Szafrañiec <i>et al</i> (2003)               |
|                                           | MA                     | Growth rate         | 0.261 $\pm$ 0.019 | 204 (204)                | Wloch <i>et al</i> (2001)                    |
|                                           | Transposon mutagenesis | Total fitness       | 0.032 $\pm$ 0.011 | 25 (25)                  | Hatcher <i>et al</i> (1998)                  |
| <i>S. cerevisiae</i> (diploid)            | Chemical mutagenesis   | Growth rate         | 0.009 $\pm$ 0.002 | 109 (109)                | Szafrañiec <i>et al</i> (2003)               |
|                                           | MA                     | Growth rate         | 0.041             | 151 lines                | Joseph & Hall (2004)                         |
| <i>Aspergillus nidulans</i>               | MA                     | Total fitness       | 0.010             | 50 lines                 | Zeyl & de Visser (2001)                      |
|                                           | MA                     | Growth rate         | 0.019 $\pm$ 0.009 | 80 lines                 | Bruggeman <i>et al</i> (2003)                |
| <i>Daphnia pulex</i>                      | MA                     | Life-history traits | 0.004 $\pm$ 0.001 | 100 lines                | Lynch <i>et al</i> (1998)                    |
| <i>Caenorhabditis elegans</i>             | MA                     | Productivity        | 0.028 $\pm$ 0.010 | 100 lines                | Vassilieva <i>et al</i> (2000)               |
|                                           | MA                     | Growth rate         | 0.378             |                          |                                              |
|                                           | MA                     | Productivity        | 0.001             | 60 lines                 | Davies <i>et al</i> (1999)                   |
| <i>Drosophila melanogaster</i>            | MA                     | Productivity        | 0.007             | 50 lines                 | Keightley & Caballero (1997) <sup>1</sup>    |
|                                           | MA                     | Viability           | 0.003             | 72 lines                 | Mukai <i>et al</i> (1972) <sup>2</sup>       |
|                                           | Chemical mutagenesis   | Viability           | 0.005             | 136 (?)                  | Ohnishi (1977) <sup>2</sup>                  |
|                                           | MA                     | Viability           | 0.023             | 72 lines                 | Fry <i>et al</i> (1999) <sup>2</sup>         |
|                                           | MA                     | Viability           | 0.015             | 176 lines                | Fernández & López-Fanjul (1996) <sup>2</sup> |
| <i>Arabidopsis thaliana</i>               | MA                     | Total fitness       | 0.035             | 1000 lines               | Schultz <i>et al</i> (1999)                  |
|                                           | MA                     | Various             | 0.071 $\pm$ 0.018 | 40 lines                 | Shaw <i>et al</i> (2000)                     |

<sup>1</sup> Number of mutant genotypes tested. The number in parentheses corresponds to the total number of different mutations used.

<sup>2</sup> Reviewed in García-Dorado *et al* (1999)

MA, mutation accumulation; SEM, standard error of the mean.

## SUPPLEMENTARY REFERENCES

- Bruggeman J, Debets AJM, Wijngaarden PJ, de Visser JAGM, Hoekstra RF (2003) Sex slows down the accumulation of deleterious mutations in the homothallic fungus *Aspergillus nidulans*. *Genetics* **164**: 479-485
- Burch CL, Chao L (2004) Epistasis and its relationship to canalization in the RNA virus  $\phi$ 6. *Genetics* **167**: 559-567
- Butrapet S, Huang CY, Pierro DJ, Bhamarapavati N, Gubler DJ, Kinney RM (2000) Attenuation markers of a candidate Dengue type 2 vaccine virus, strain 16681 (PDK-53), are defined by mutations in the 5' noncoding region and nonstructural proteins 1 and 3. *J Virol* **74**: 3011-3019
- Crotty S, Cameron CE, Andino R (2001) RNA virus error catastrophe: direct molecular test by using ribavirin. *Proc Natl Acad Sci USA* **98**: 6895-6900
- Davies EK, Peters AD, Keightley PD (1999) High frequency of cryptic deleterious mutations in *Caenorhabditis elegans*. *Science*, **285**: 1748-1751
- Elena SF, Ekunwe L, Hajela N, Oden SA, Lenski RE (1998) Distribution of fitness effects caused by random insertion mutations in *Escherichia coli*. *Genetica* **102/103**: 349-358
- Elena SF, Moya A (1999) Rate of deleterious mutation and the distribution of its effects on fitness in vesicular stomatitis virus. *J Evol Biol* **12**: 1078-1088
- Escarmís C, Dávila M, Charpentier N, Bracho MA, Moya A, Domingo E (1996) Genetic lesions associated with Muller's ratchet in an RNA virus. *J Mol Biol* **264**: 255-267

- Fernández J, López-Fanjul C (1996) Spontaneous mutational variances and covariances for fitness-related traits in *Drosophila melanogaster*. *Genetics* **143**: 829-837
- Fry JD, Keightley PD, Heinsohn SL, Nuzhdin SV (1999) New estimates of the rates and effects of mildly deleterious mutations in *Drosophila melanogaster*. *Proc Natl Acad Sci USA* **96**: 574-579
- García-Dorado A, López-Fanjul C, Caballero A (1999) Properties of spontaneous mutations affecting quantitative traits. *Genet Res Camb* **74**: 341-350
- Gritsun TS, Desai A, Gould EA (2001) The degree of attenuation of tick-borne encephalitis virus depend on the cumulative effects of point mutations. *J Gen Virol* **82**: 1667-1675
- Joseph SB, Hall DW (2004) Spontaneous mutations in diploid *Saccharomyces cerevisiae*: more beneficial than expected. *Genetics* **168**: 1817-1825
- Keightley PD, Caballero A (1997) Genomic mutation rates for lifetime reproductive output and lifespan in *Caenorhabditis elegans*. *Proc Natl Acad Sci USA* **94**: 3823-3827
- Kibota TT, Lynch M (1996) Estimate of the genomic mutation rate deleterious to overall fitness in *E. coli*. *Nature* **381**: 694-696
- Kinney RM, Chang GJ, Tsuchiya KR, Sneider JM, Roehrig JT, Woodward TM, Trent DW (1993) Attenuation of Venezuelan equine encephalitis virus strain TC-83 is encoded by the 5'-noncoding region and the E2 envelope glycoprotein. *J Virol* **67**: 1269-1277

- Lynch M, Latta L, Hicks J, Giorgianni M (1998) Mutation, selection, and the maintenance of life-history variation in a natural population. *Evolution* **52**: 727-733
- Mukai T, Chigusa SI, Mettler LE, Crow JF (1972) Mutation rate and dominance of genes affecting viability in *Drosophila melanogaster*. *Genetics* **72**: 335-355
- Ohnishi O (1977) Spontaneous and ethyl-ethanesulfonate-induced mutations controlling viability in *Drosophila melanogaster*. I. Recessive lethal mutations. *Genetics* **87**: 519-527
- Schultz ST, Lynch M, Willis JH (1999) Spontaneous deleterious mutation in *Arabidopsis thaliana*. *Proc Natl Acad Sci USA* **96**: 11393-11398
- Sierra S, Dávila, M, Lowenstein PR, Domingo E (2000) Response of foot-and-mouth disease virus to increased mutagénesis: influence of viral load and fitness in loss of infectivity. *J Virol* **74**: 8316-8323
- Sanjuán R, Moya A, Elena SF (2004) The distribution of fitness effects caused by single-nucleotide substitutions in an RNA virus. *Proc Natl Acad Sci USA* **101**: 8396-8401
- Shaw RG, Byers DL, Darms E (2000) Spontaneous mutational effects on reproductive traits of *Arabidopsis thaliana*. *Genetics* **155**: 369-378
- Szafraniec K, Wloch DM, Sliwa P, Borts RH, Korona R (2003) Small fitness effects and weak genetic interactions between deleterious mutations in heterozygous loci of the yeast *Saccharomyces cerevisiae*. *Genet Res Camb* **82**: 19-31
- Thatcher JW, Shaw JM, Dickinson WJ (1998) Marginal fitness contributions of nonessential genes in yeast. *Proc Natl Acad Sci USA* **95**: 253-257

- Vassilieva LL, Hook AM, Lynch M (2000) The fitness effects of spontaneous mutations in *Caenorhabditis elegans*. *Evolution* **54**: 1234-1246
- Wloch DM, Szafraniec K, Borts RH, Korona R (2001) Direct estimate of the mutation rate and the distribution of fitness effects in the yeast *Saccharomyces cerevisiae*. *Genetics* **159**: 441-452
- Yuste E, Sánchez-Palomino S, Casado C, Domingo E, López-Galíndez C (1999) Drastic fitness loss in human immunodeficiency virus type 1 upon serial bottleneck events. *J Virol*, **73**: 2745-2751
- Yuste E, López-Galíndez C, Domingo E (2000) Unusual distribution of mutations associated with serial bottleneck passages of human immunodeficiency virus type-1. *J Virol* **74**: 9546-9552
- Yuste E, Bordería AV, Domingo E, López-Galíndez C (2005) Few mutations in the 5' leader region mediate fitness recovery of debilitated human immunodeficiency type 1 viruses. *J Virol* **79**: 5421-5427
- Zeyl C, de Visser JAGM (2001) Estimates of the rate and distribution of fitness effects of spontaneous mutation in *Saccharomyces cerevisiae*. *Genetics* **157**: 53-61
